# Supplementary material for: Transparent Polymer Blends of Poly(methyl methacrylate) and Poly(propylene glycol)
Source: MDPI journal article supplement (doi:10.3390/polym14112171), 2022-05-27
Supplement: s1 [file s1]

# Supplementary Materials: Transparent Polymer Blends of Poly(methyl methacrylate) and Poly(propylene glycol)

Andrei A. Korigodskii <sup>1\*</sup> , Artem E. Zhirnov <sup>1</sup>, Alexander S. Kechekyan <sup>2</sup> and Sergey B. Zezin <sup>1</sup>

## Synthesis

Materials of the compositions listed in Table S1 were obtained.

**Table S1.** Samples composition

| Monomer | Plasticizing agent (P.A.) | $M_n$ of P.A. | P.A. content, wt% |
|---------|---------------------------|---------------|-------------------|
| MMA     | —                         | —             | 0                 |
| MMA     | Poly(propylene glycol)    | 446           | 2; 3; 5; 10; 30   |
| MMA     | Poly(propylene glycol)    | 1010          | 2; 5; 10; 30      |
| MMA     | Poly(propylene glycol)    | 2025          | 2; 5; 10; 30      |

All the samples excluding the one containing 30 wt.% of PPG ( $M_n$  2025) maintained optical transparency.

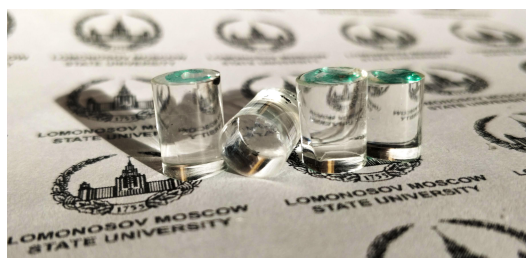

**Figure S1.** Typical samples of PMMA–PPG blend. All the obtained samples (except the one with 30 wt.% of PPG  $M_n$  2025) are completely transparent.

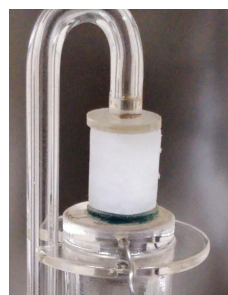

**Figure S2.** Sample with 30 wt.% of PPG ( $M_n$  2025) is strongly opalescent.

## Raman spectroscopy

Raman spectroscopy was conducted using Horiba Jobin-Yvon LabRam HR800 spectrometer with 488 nm laser. The cylinder samples of PMMA–PPG blends with different content of PPG ( $M_n$  446) were investigated. Methyl(methacrylate) and poly(propylene glycol) ( $M_n$  446) were in liquid form.

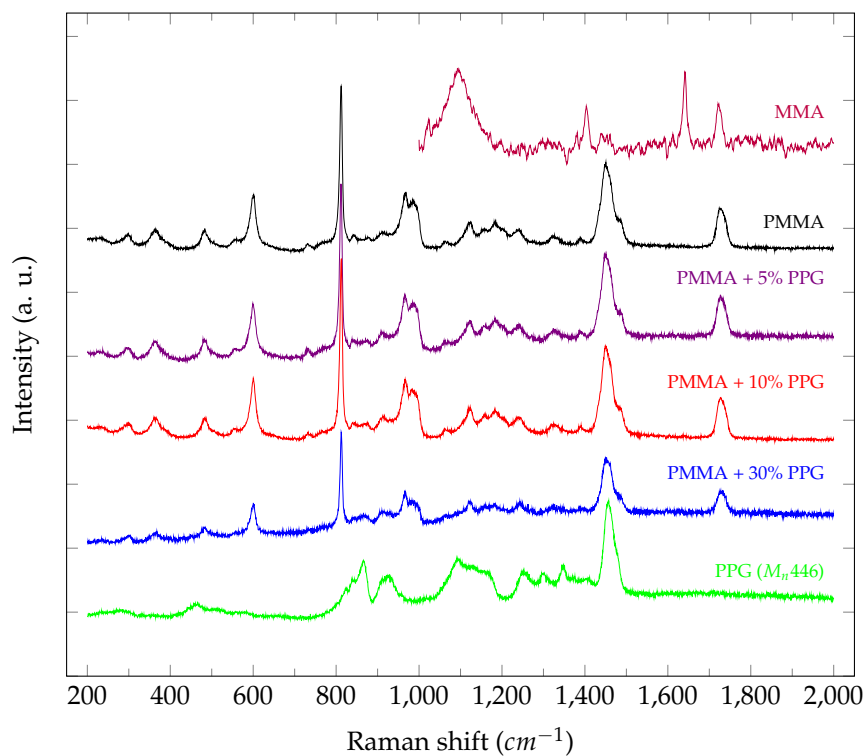

**Figure S3.** Raman spectra of the blends of poly(methyl methacrylate) and poly(propylene glycol) with  $M_n$  of 446.

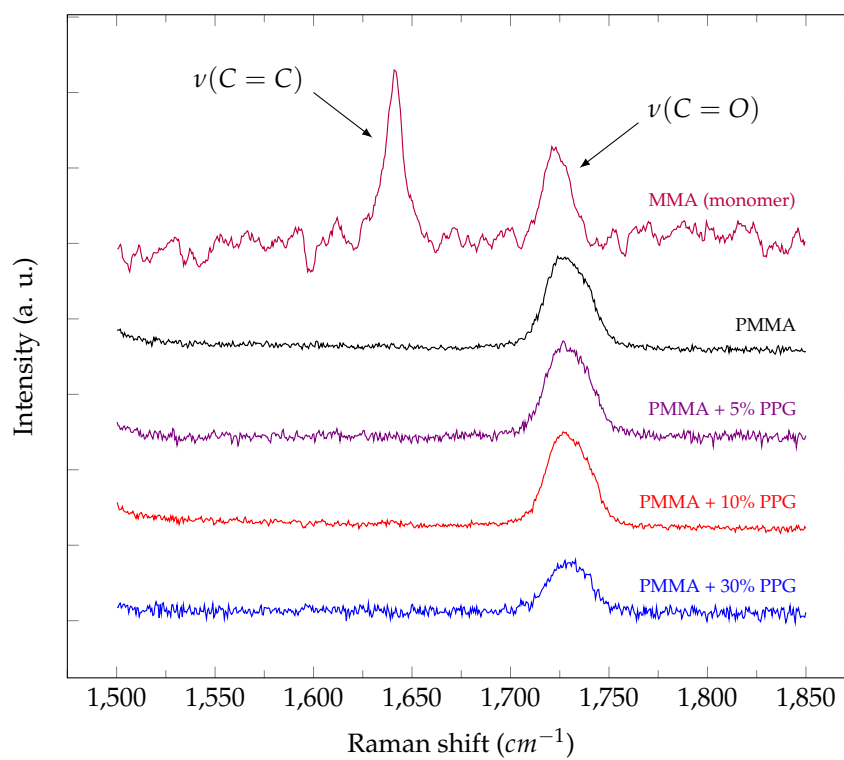

**Figure S4.** Raman spectroscopy confirms the absence of the monomer in the samples.

## Infrared absorbance spectroscopy

A Specord M80 IR absorbance spectrometer was used to measure IR absorbance in 500–2000  $\text{cm}^{-1}$  range with resolution of 4  $\text{cm}^{-1}$ /pt. About 5 mg of the samples was filed with a needle file, rubbed in a mortar with KBr and then pressed into a disk (tablet) with a pneumatic press. Poly(propylene glycol) was investigated in the liquid form.

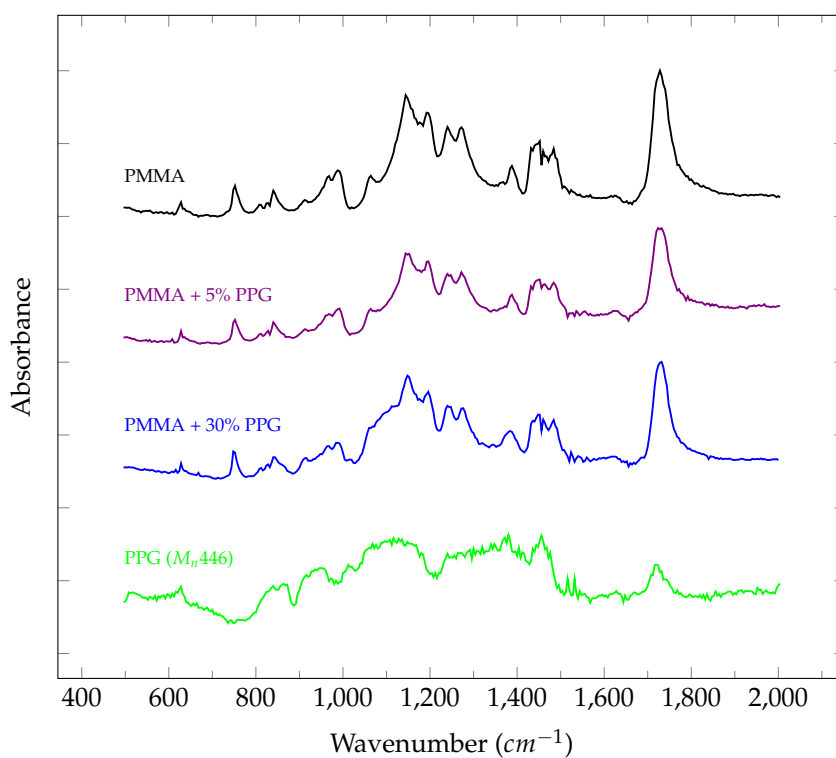

**Figure S5.** Infrared absorbance spectra of the blends of poly(methyl methacrylate) and poly(propylene glycol) with  $M_n$  of 446.

## Dynamic mechanical thermal analysis

**Table S2.** DMTA tabular results

| PPG units<br>fraction, % | PPG $M_n$ 446<br>$T_g$ , °C | PPG $M_n$ 1010<br>$T_g$ , °C | PPG $M_n$ 2025<br>$T_g$ , °C |
|--------------------------|-----------------------------|------------------------------|------------------------------|
| 0.0                      | 121.5                       | 121.5                        | 121.5                        |
| 3.4                      | 115.3                       | 116.8                        | 118.1                        |
| 8.3                      | 108.6                       | 110.2                        | 112.3                        |
| 16.1                     | 96.8                        | 99.7                         | 103.1                        |
| 42.5                     | 56.3                        | 69.7                         | 31.3                         |

## Compression testing

**Table S3.** Compression testing tabular results

| PPG content, wt. % | PPG units fraction, % | Elastic modulus, GPa | Yield strength, MPa | Yield strain, % |
|--------------------|-----------------------|----------------------|---------------------|-----------------|
| 0                  | 0                     | 1.55                 | 145.8               | 15.2            |
| 2                  | 3.4                   | 1.46                 | 145.5               | 15.1            |
| 3                  | 5.1                   | 1.44                 | 136.5               | 13.8            |
| 5                  | 8.3                   | 1.40                 | 129.9               | 13.3            |
| 10                 | 16.1                  | 1.28                 | 107.5               | 11.5            |
| 30                 | 42.5                  | 0.24                 | 16.0                | 9.1             |

## X-ray diffraction

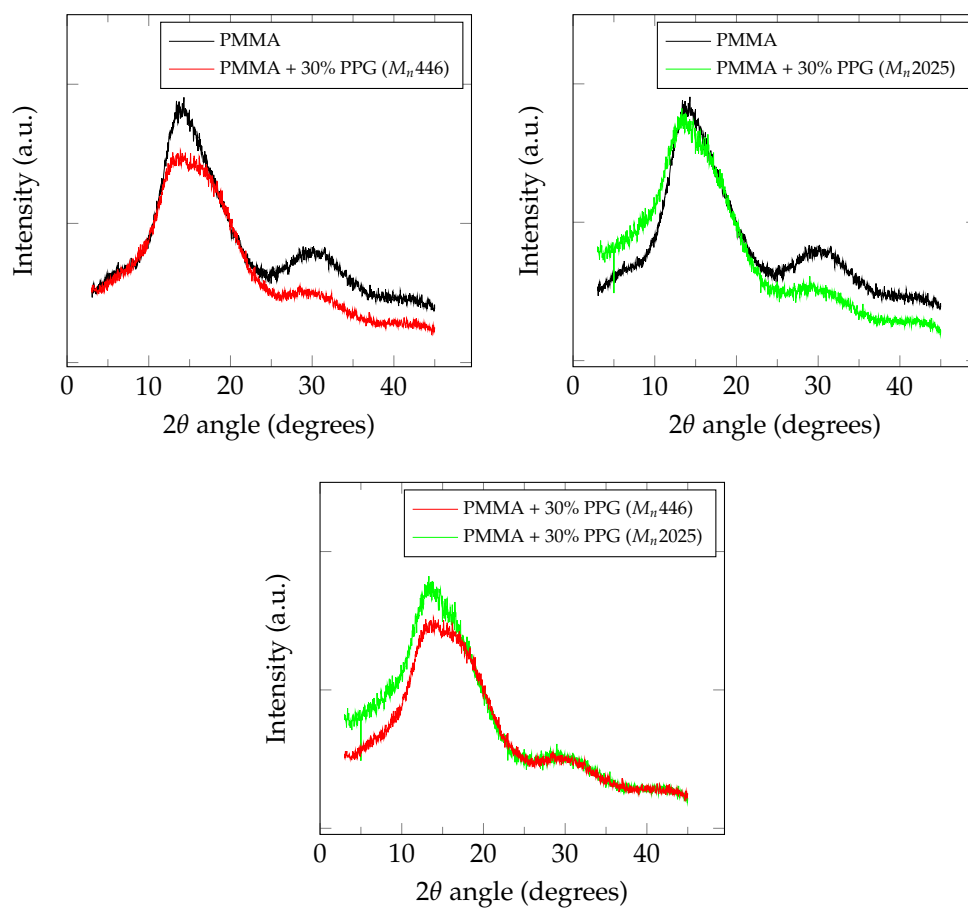

**Figure S6.** X-ray diffraction. The samples of pure PMMA and PMMA with 30 wt.% of PPG ( $M_n$  446) are transparent, while the sample of PMMA with 30 wt.% of PPG ( $M_n$  2025) is opalescent.
